# Supplementary material
Source: publisher figshare collection journal article supplement (https://frontiersin.figshare.com/ndownloader/files/33527138)

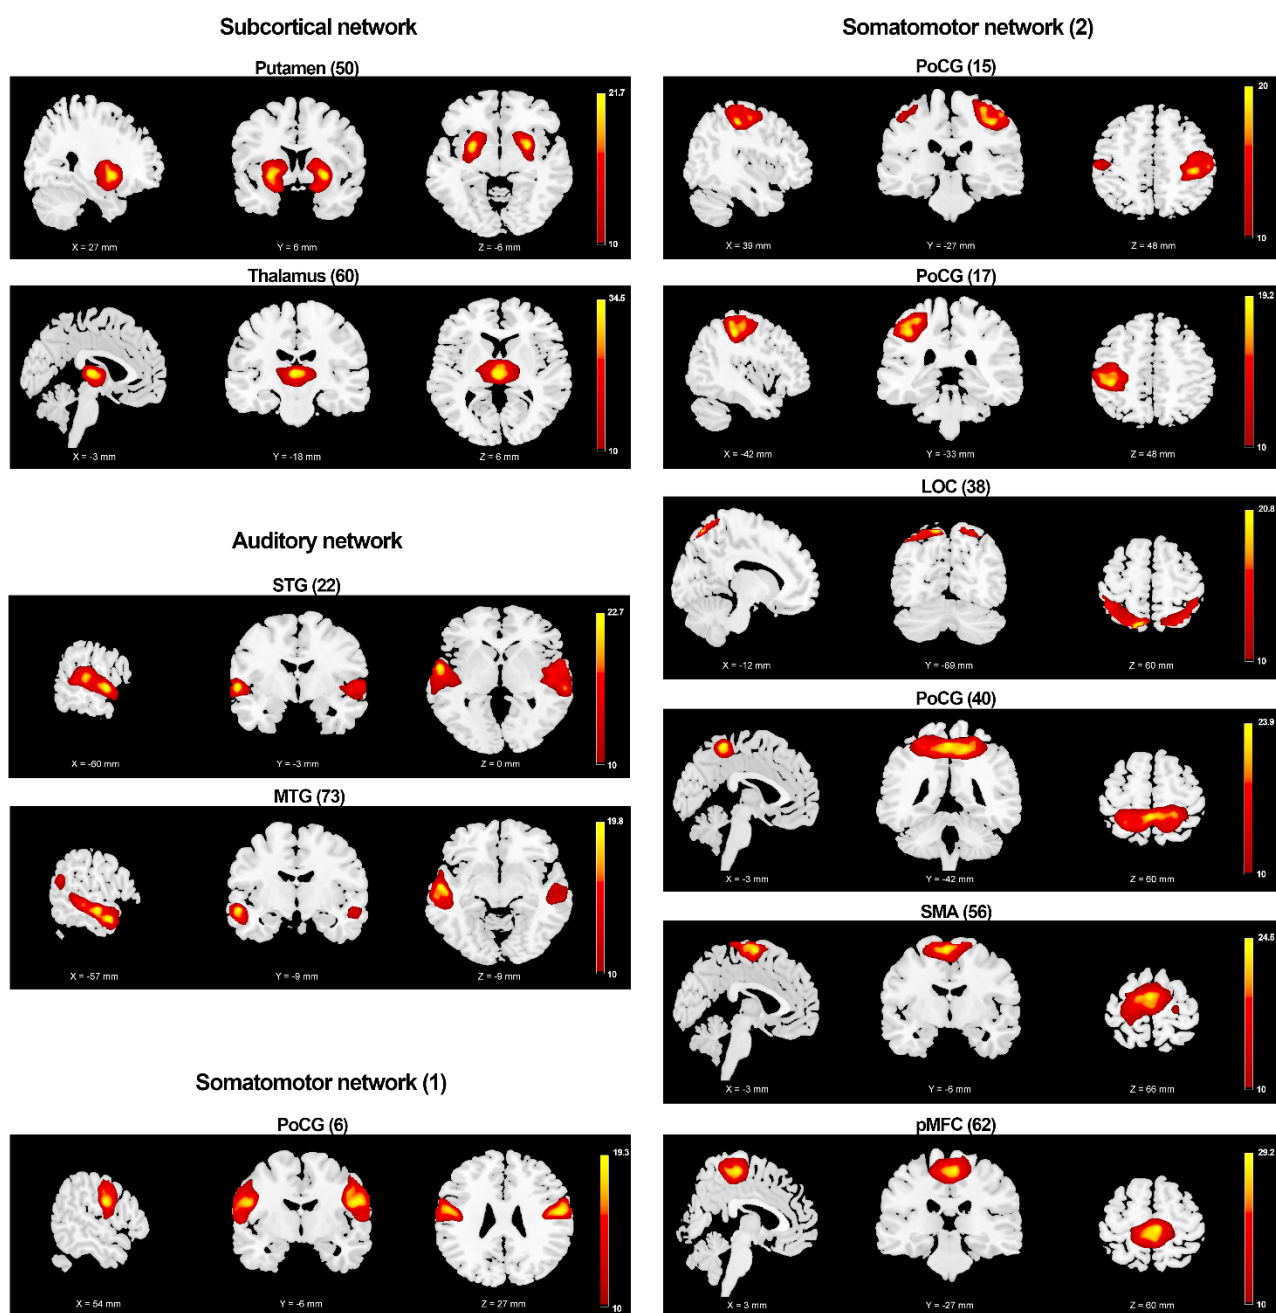

**Supplementary Figure 1. Spatial Maps of independent component.** Each independent component is thresholded at  $|t| > 10$ , where one-sample t-statistics have been computed across the entire subject group. The MNI coordinates of the peak values for each spatial map are displayed below the three orthogonal planes. The color bar represents t values.

### Visual network (1)

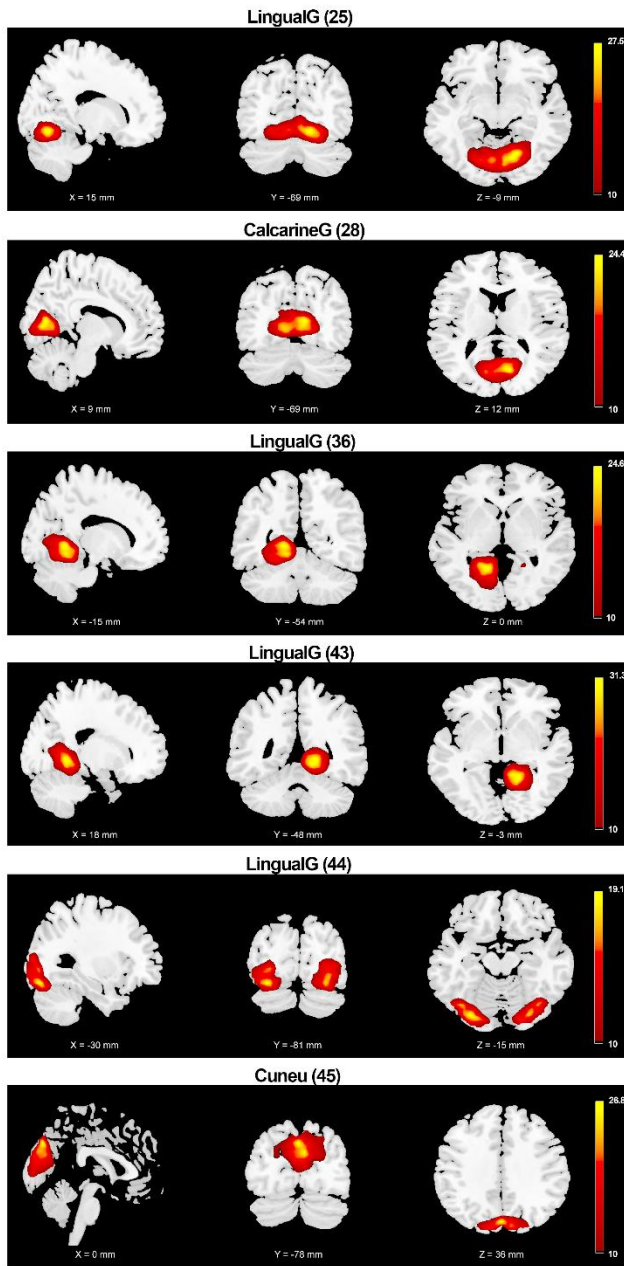

### Visual network (2)

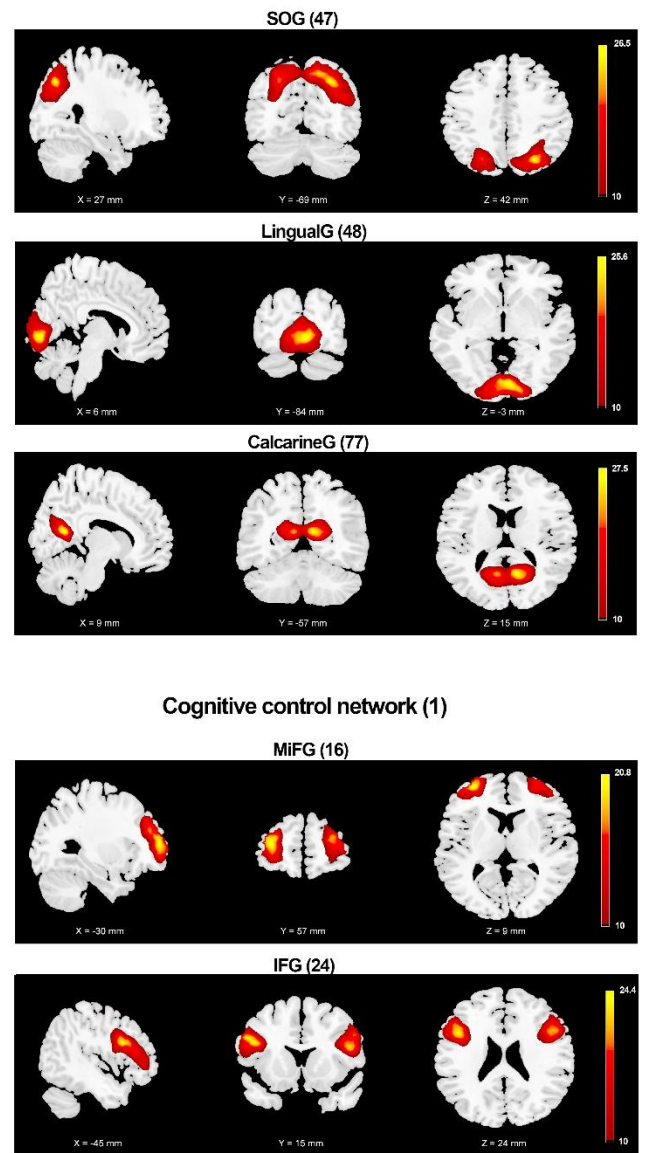

Cognitive control network (2)

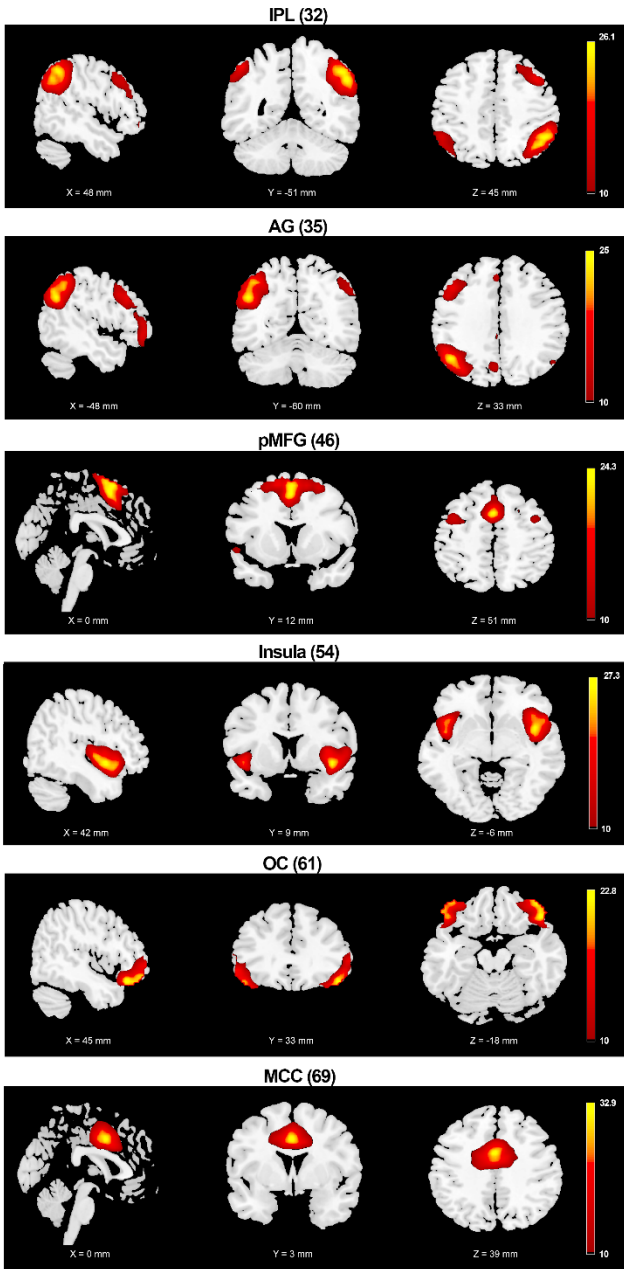

Cognitive control network (3)

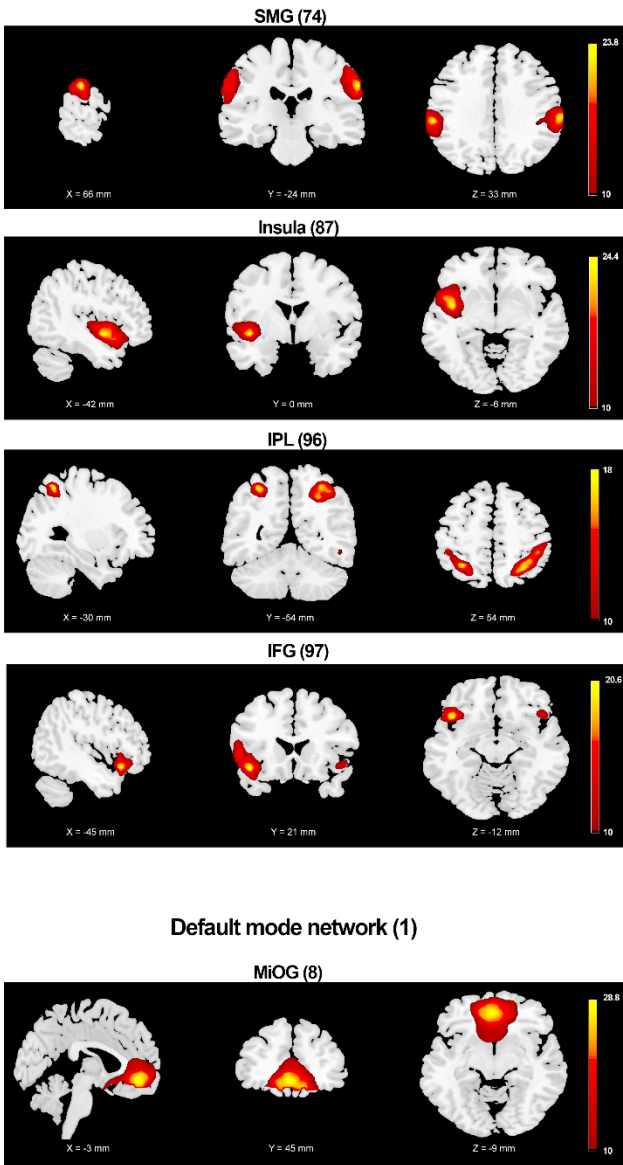

### Default mode network (2)

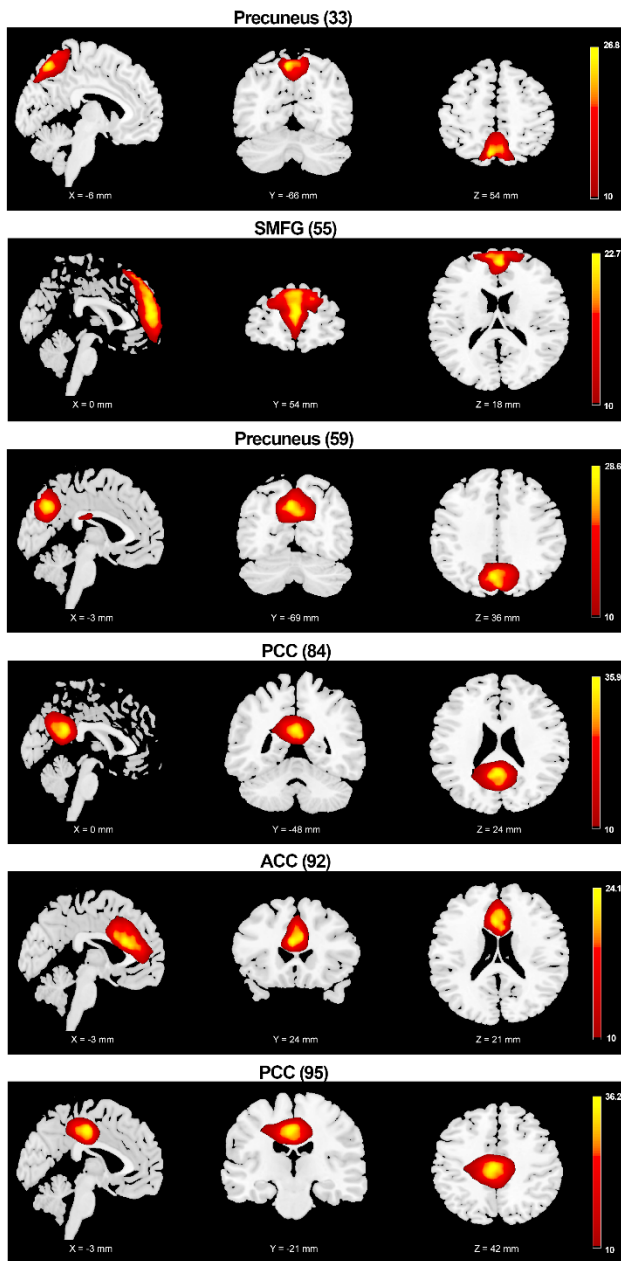

### Default mode network (3)

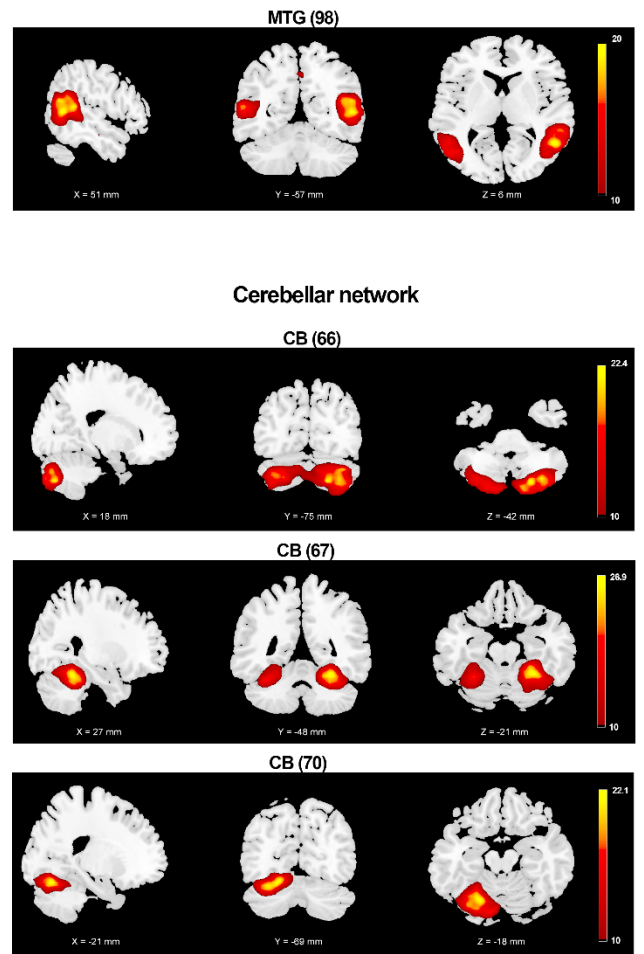

Supplement: Supplementary file [file 33527138]
